# Supplementary material for: A supramolecular protein chaperone for vaccine delivery
Source: PubMed Central journal article supplement (PMC6929975; doi:10.7150/thno.39132), 2020-01-01
Supplement: thnov10p0657s1.pdf [file thnov10p0657s1.pdf]

## Supplementary information

### A supramolecular protein chaperone for vaccine delivery

Zhongyan Wang, Yuna Shang, Zhaoqi Tan, Xiaoyan Li, Guoliang Li, Chunhua Ren\*,

Fuqiang Wang\*, Zhimou Yang and Jianfeng Liu\*

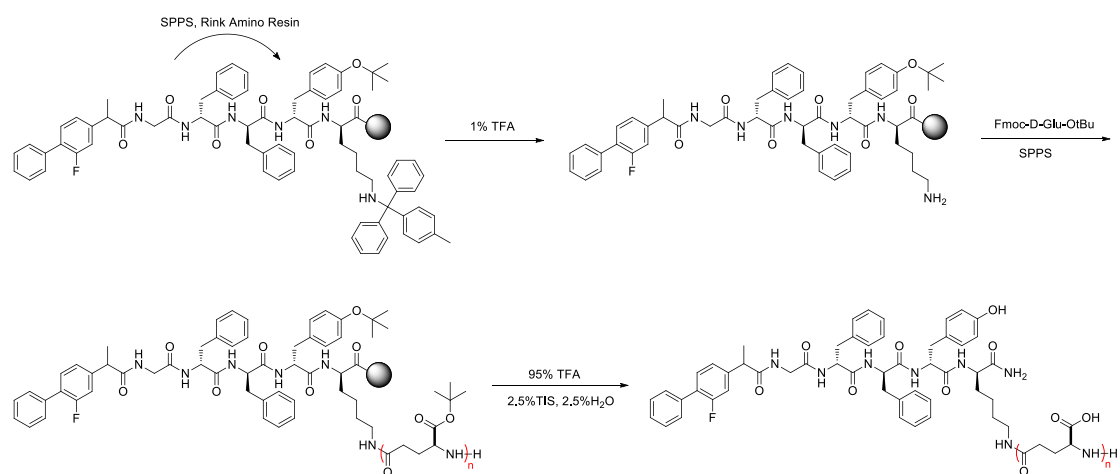

**Scheme S1.** Chemical structures and synthetic route of Fbp-G<sup>D</sup>F<sup>D</sup>F<sup>D</sup>Y<sup>D</sup>K(γE)<sub>n</sub>-NH<sub>2</sub>.

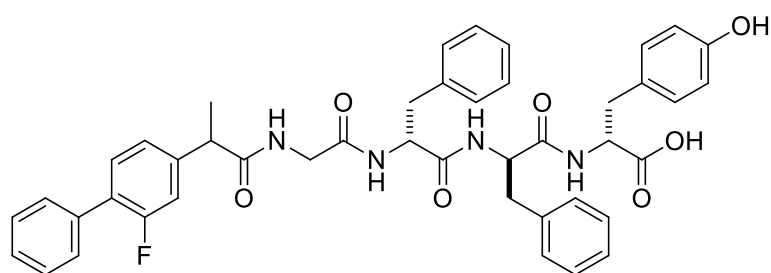

**Scheme S2.** The chemical structures of Fbp-G<sup>D</sup>F<sup>D</sup>F<sup>D</sup>Y (**Comp. 2**).

## Characteristic of compounds:

**Fbp-G<sup>D</sup>F<sup>D</sup>F<sup>D</sup>Y<sup>D</sup>K(γE)<sub>2</sub>-NH<sub>2</sub>:** <sup>1</sup>H NMR (400 MHz, DMSO) δ 8.39 – 8.16 (m, 1H), 8.09 – 7.99 (m, 1H), 7.90 (d, *J* = 7.6 Hz, 1H), 7.83 (s, 1H), 7.49 – 7.33 (m, 1H), 7.23 – 7.11 (m, 2H), 6.99 (s, 1H), 4.49 – 4.41 (m, 1H), 4.10 (d, *J* = 3.9 Hz, 1H), 3.87 (d, *J* = 5.7 Hz, 1H), 3.73 (d, *J* = 6.9 Hz, 1H), 3.63 – 3.47 (m, 1H), 3.09 – 2.87 (m, 1H), 2.46 (d, *J* = 1.8 Hz, 1H), 2.38 – 2.26 (m, 1H), 2.10 (t, *J* = 7.4 Hz, 1H), 2.02 – 1.90 (m, 1H), 1.30 (d, *J* = 7.0 Hz, 1H). *M*<sub>cal</sub> = 1144.2487, *M*<sub>exa</sub> = 1144.5145

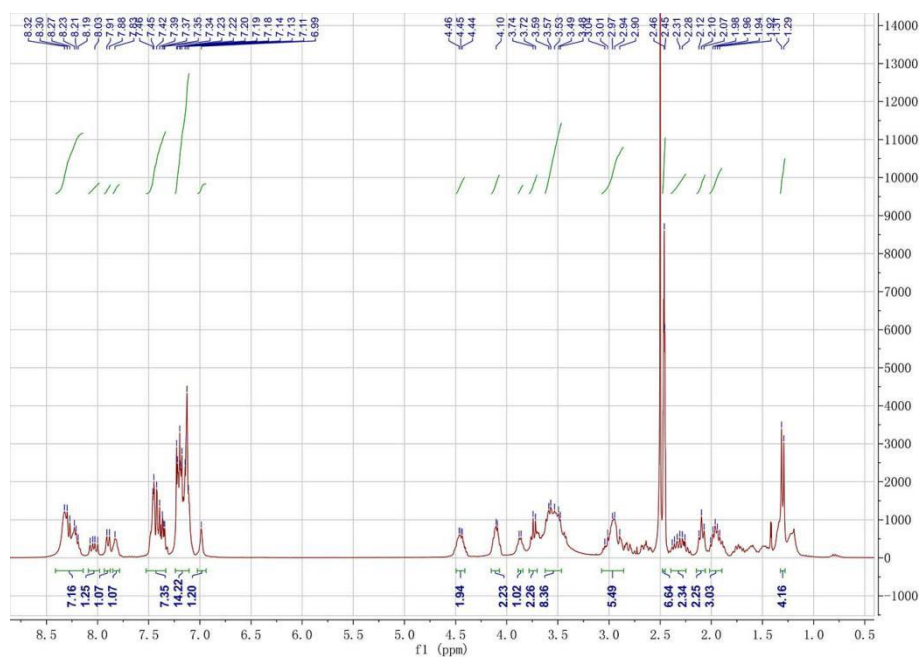

**Fig. S1.** <sup>1</sup>H NMR spectrum of Fbp-G<sup>D</sup>F<sup>D</sup>F<sup>D</sup>Y<sup>D</sup>K(γE)<sub>2</sub>-NH<sub>2</sub>.

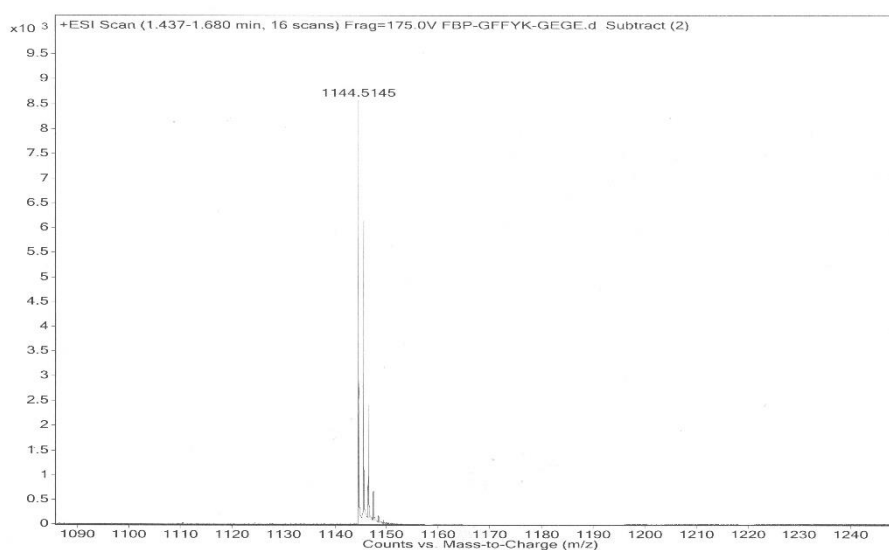

**Fig. S2.** HR-MS spectrum of Fbp-G<sup>D</sup>F<sup>D</sup>F<sup>D</sup>Y<sup>D</sup>K(γE)<sub>2</sub>-NH<sub>2</sub>.

**Fbp-G<sup>D</sup>F<sup>D</sup>F<sup>D</sup>Y:** <sup>1</sup>H NMR (400 MHz, DMSO) δ 8.25 – 8.16 (m, 1H), 8.03 – 7.95 (m, 1H), 7.53 – 7.38 (m, 2H), 7.28 – 7.13 (m, 4H), 7.02 (d, *J* = 5.4 Hz, 1H), 6.66 (d, *J* = 5.8 Hz, 1H), 4.58 – 4.46 (m, 1H), 4.37 (d, *J* = 5.4 Hz, 1H), 3.78 – 3.72 (m, 1H), 3.65 – 3.54 (m, 1H), 3.48 (m, 1H), 3.05 – 2.91 (m, 1H), 2.87 – 2.71 (m, 1H), 2.69 – 2.59 (m, 1H), 1.37 – 1.28 (m, 1H). *M*<sub>cal</sub> = 758.83, (*M*+*H*)<sup>+</sup> = 759.3189.

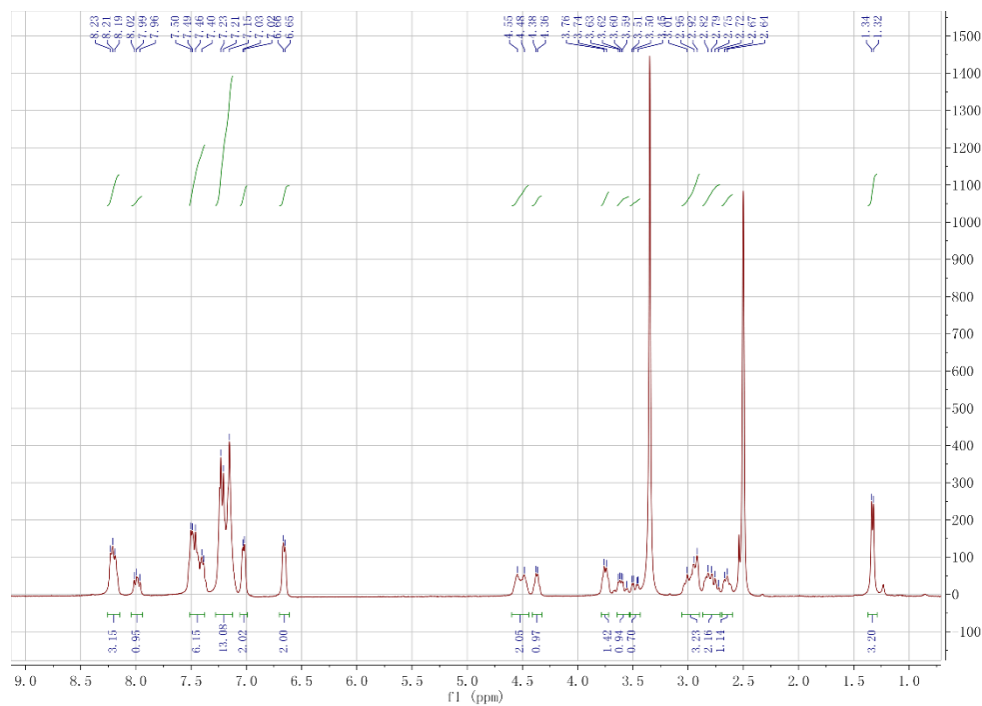

**Fig. S3.** <sup>1</sup>H NMR spectrum of Fbp-G<sup>D</sup>F<sup>D</sup>F<sup>D</sup>Y.

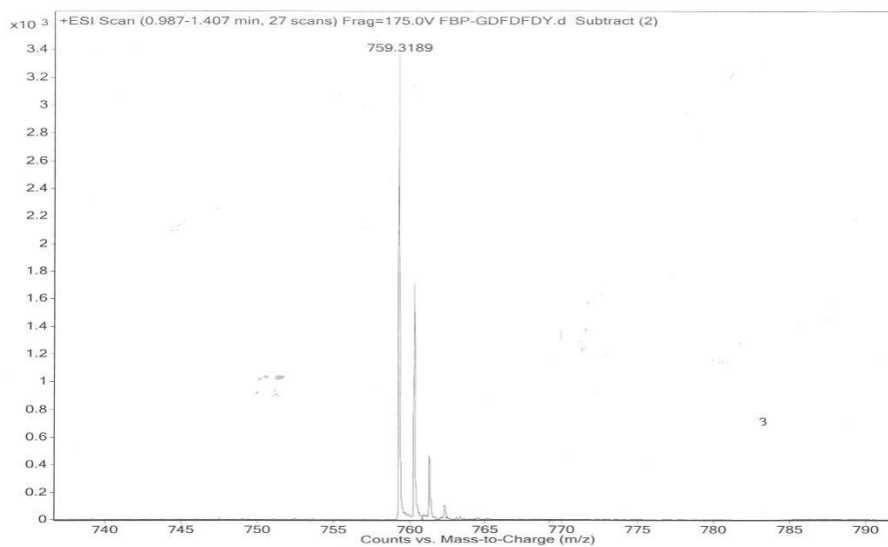

**Fig. S4.** HR-MS spectrum of Fbp-G<sup>D</sup>F<sup>D</sup>F<sup>D</sup>Y.

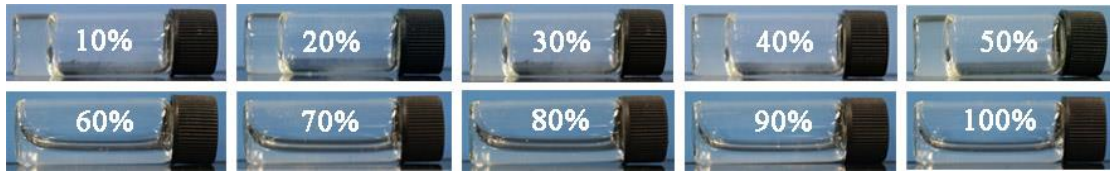

**Fig. S5.** Optical images of solution of *Comp. 1* with the addition of different amounts of OVA.

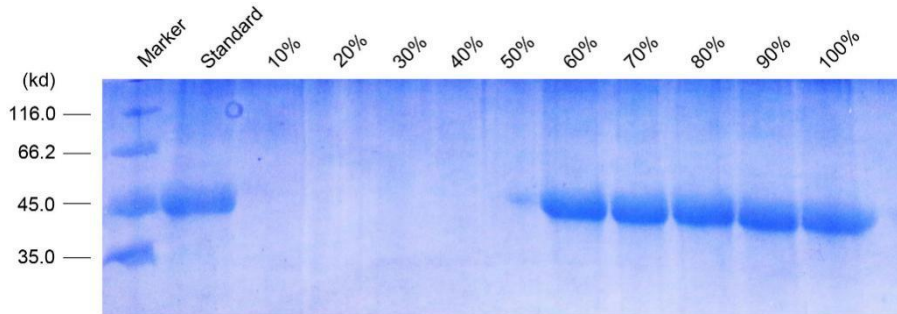

**Fig. S6.** SDS-PAGE image of *Comp. 1* with OVA maximum loading rate.

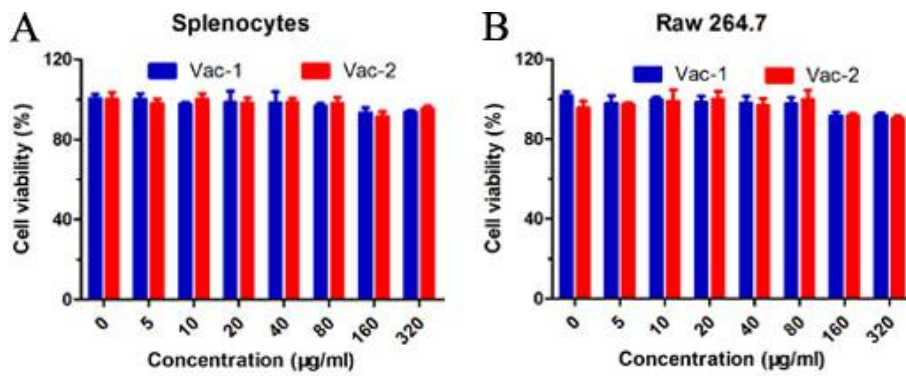

**Fig. S7.** The cytotoxicity effect of empty hydrogel on A) splenocytes and B) Raw 264.7 cells.

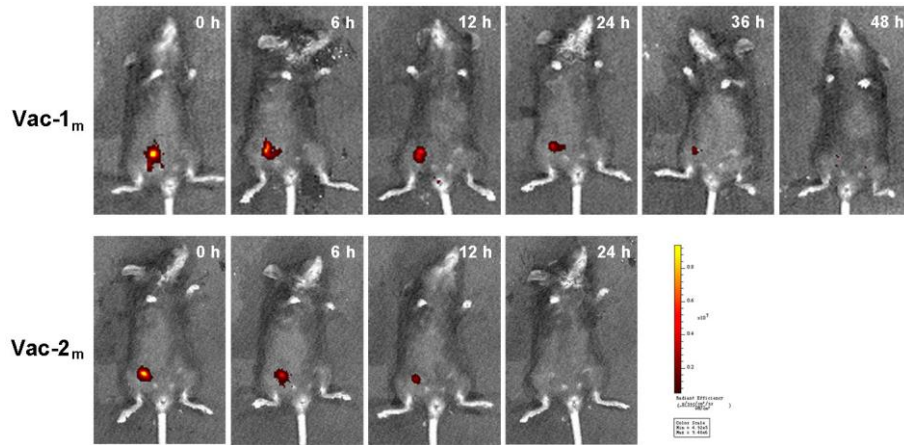

**Fig. S8.** The stability analysis *in vivo* of hydrogel vaccines

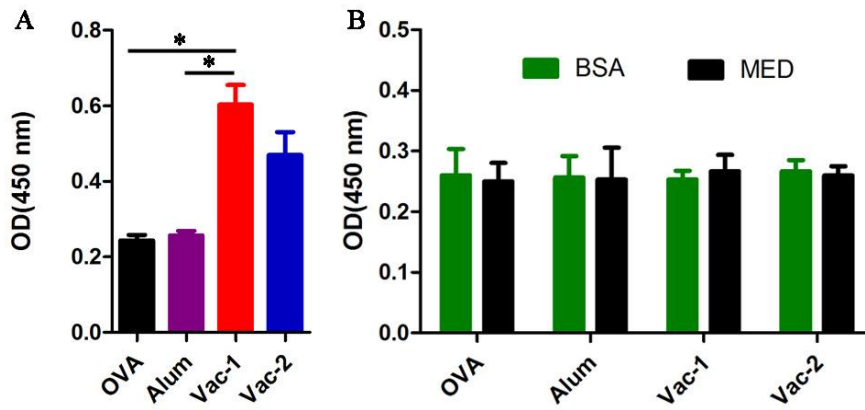

**Fig. S9.** The effect of Vac-1 and Vac-2 on inducing of antigen specific splenocytes proliferation *in vivo*.

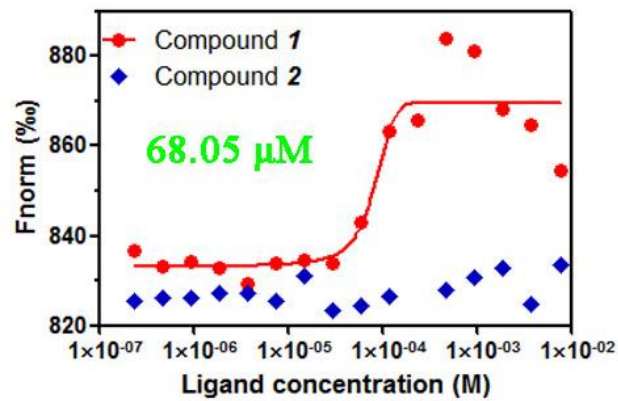

**Fig. S10.** The binding constants of compound 1 and 2 with HBsAg.

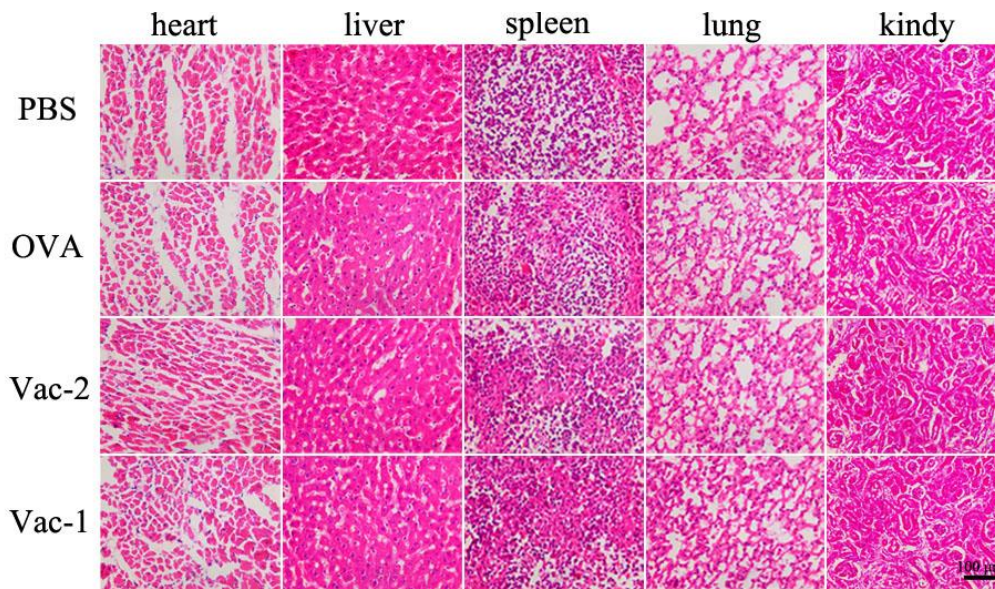

**Fig. S11.** Digital photograph of H&E staining of vital organ sections from PBS, OVA, Vac-2, or Vac-1 treated mice.

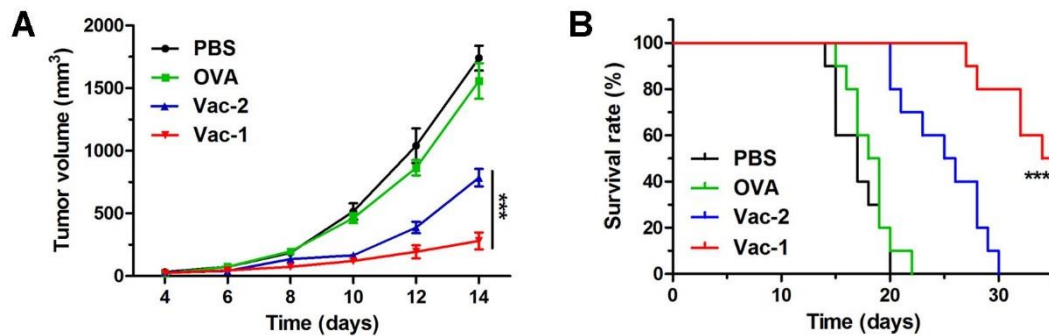

**Fig. S12.** A) B16-OVA tumor bearing C57BL/6 mice vaccinated with PBS, OVA, Vac-1, Vac-2. Mice were vaccinated and inoculated as described above, and tumor volume was monitored every 3 d. B) Survival time of mice vaccinated with PBS, OVA, Vac-1 and Vac-2, respectively.
